# Supplementary material for: Association between body mass index, dosing strategy, and efficacy of immune checkpoint inhibitors
Source: PubMed Central journal article supplement — J Immunother Cancer. 2021 Jun 14;9(6):e002349. doi: 10.1136/jitc-2021-002349 (PMC8237749; doi:10.1136/jitc-2021-002349), 2021-06-14

**Supplemental Figure 1.** Progression-free survival according to BMI in the non-melanoma cohort (N=240). **(a)** Overall cohort ( $P=0.04$ ); **(b)** weight-based dosing ( $P=0.05$ ); **(c)** fixed dosing ( $P=0.3$ ).

**Supplemental Figure 2.** Overall survival according to BMI in the non-melanoma cohort (N=240). **(a)** Overall cohort ( $P=0.3$ ); **(b)** weight-based dosing ( $P=0.05$ ); **(c)** fixed dosing ( $P=0.95$ ).

**Supplemental Figure 3.** Clinical outcomes according to dosing strategy and BMI category. **(a)** PFS ( $P=0.05$ ); **(b)** OS ( $P=0.08$ ). For BMI <25, median PFS 199 days with fixed-dose vs 81 days with weight-based ICI ( $P=0.16$ ); median OS 455 days with fixed-dose vs 158 days with weight-based ICI ( $P=0.04$ ). For BMI  $\geq 25$ , median PFS 264 days with fixed-dose vs 406 days with weight-based ICI ( $P=0.39$ ); median OS 502 days with fixed-dose vs 742 days with weight-based ICI ( $P=0.47$ ).

**Supplemental Figure 4.** Clinical outcomes according to dosing strategy and BMI category with underweight (BMI <18.5) removed. **(a)** PFS with weight-based dosing ( $P=0.05$ ); **(b)** PFS with fixed dosing ( $P=0.26$ ); **(c)** OS with weight-based dosing ( $P=0.04$ ); **(d)** OS with fixed dosing ( $P=0.52$ ).

**Supplemental Figure 5.** Clinical outcomes according to BMI and patient sex. **(a)** PFS in male patients; **(b)** PFS in female patients; **(c)** OS in male patients; **(d)** OS in female patients.

**Supplemental Figure 6.** Clinical outcomes according to BMI and ICI dosing strategy in male patients. **(a)** PFS with fixed-dose ICI; **(b)** PFS with weight-based ICI; **(c)** OS with fixed-dose ICI; **(d)** OS with weight-based dose ICI.

**Supplemental Figure 7.** Clinical outcomes according to BMI and ICI dosing strategy in female patients. *(a)* PFS with fixed-dose ICI; *(b)* PFS with weight-based ICI; *(c)* OS with fixed-dose ICI; *(d)* OS with weight-based dose ICI.

**Supplemental Figure 8.** Clinical outcomes in obese, overweight, normal, and underweight patients. *(a)* PFS; *(b)* OS.

Supplemental Figure 1. (a—top; b—middle; c—bottom)

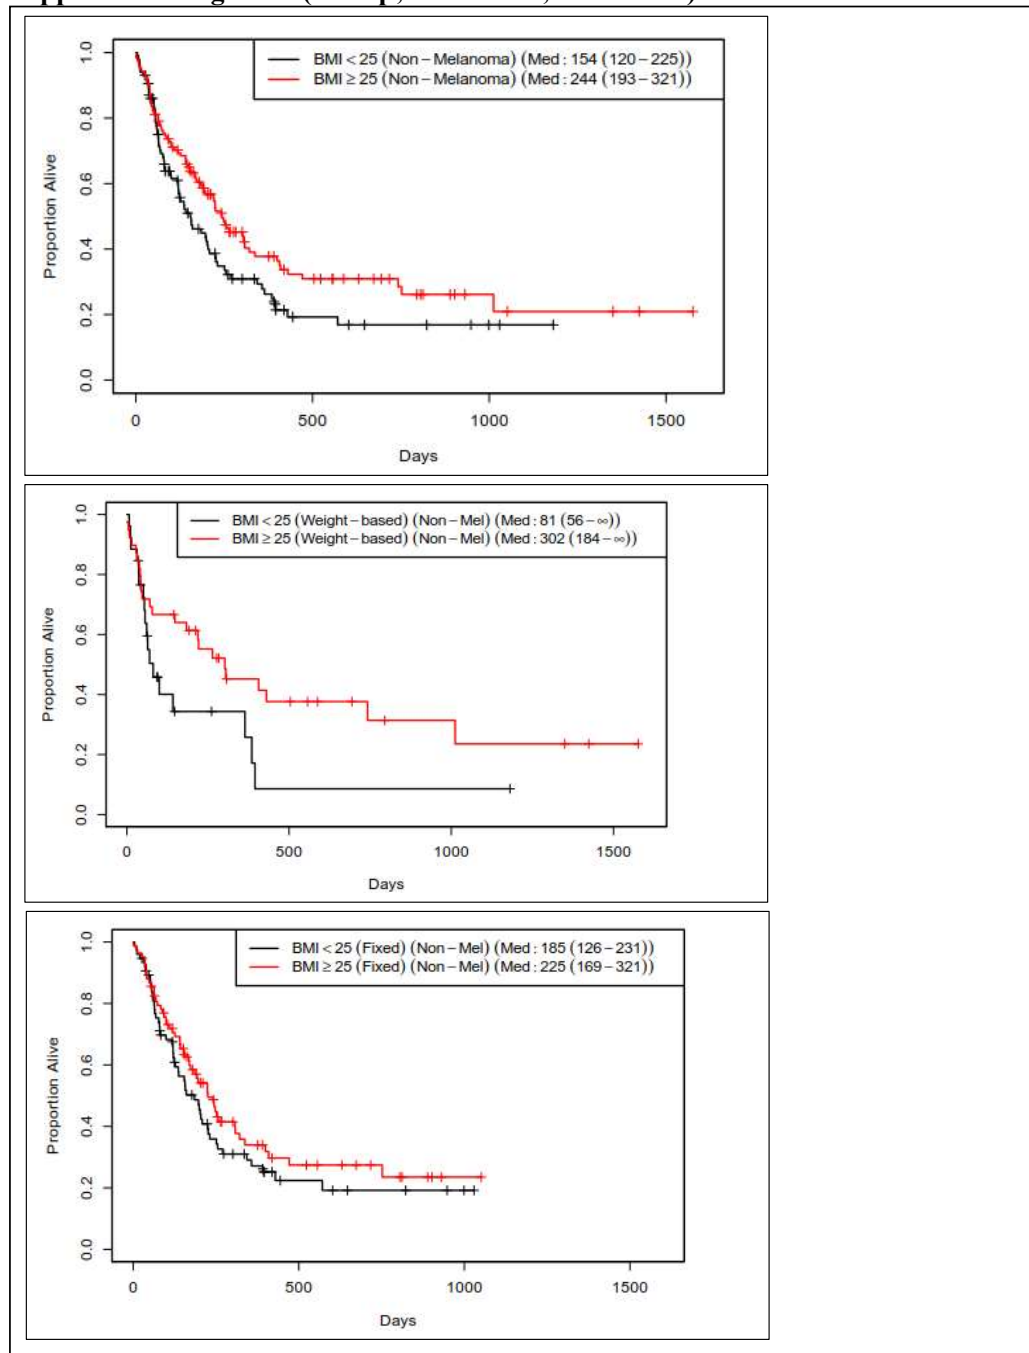

Supplemental Figure 2. (a—top; b—middle; c—bottom)

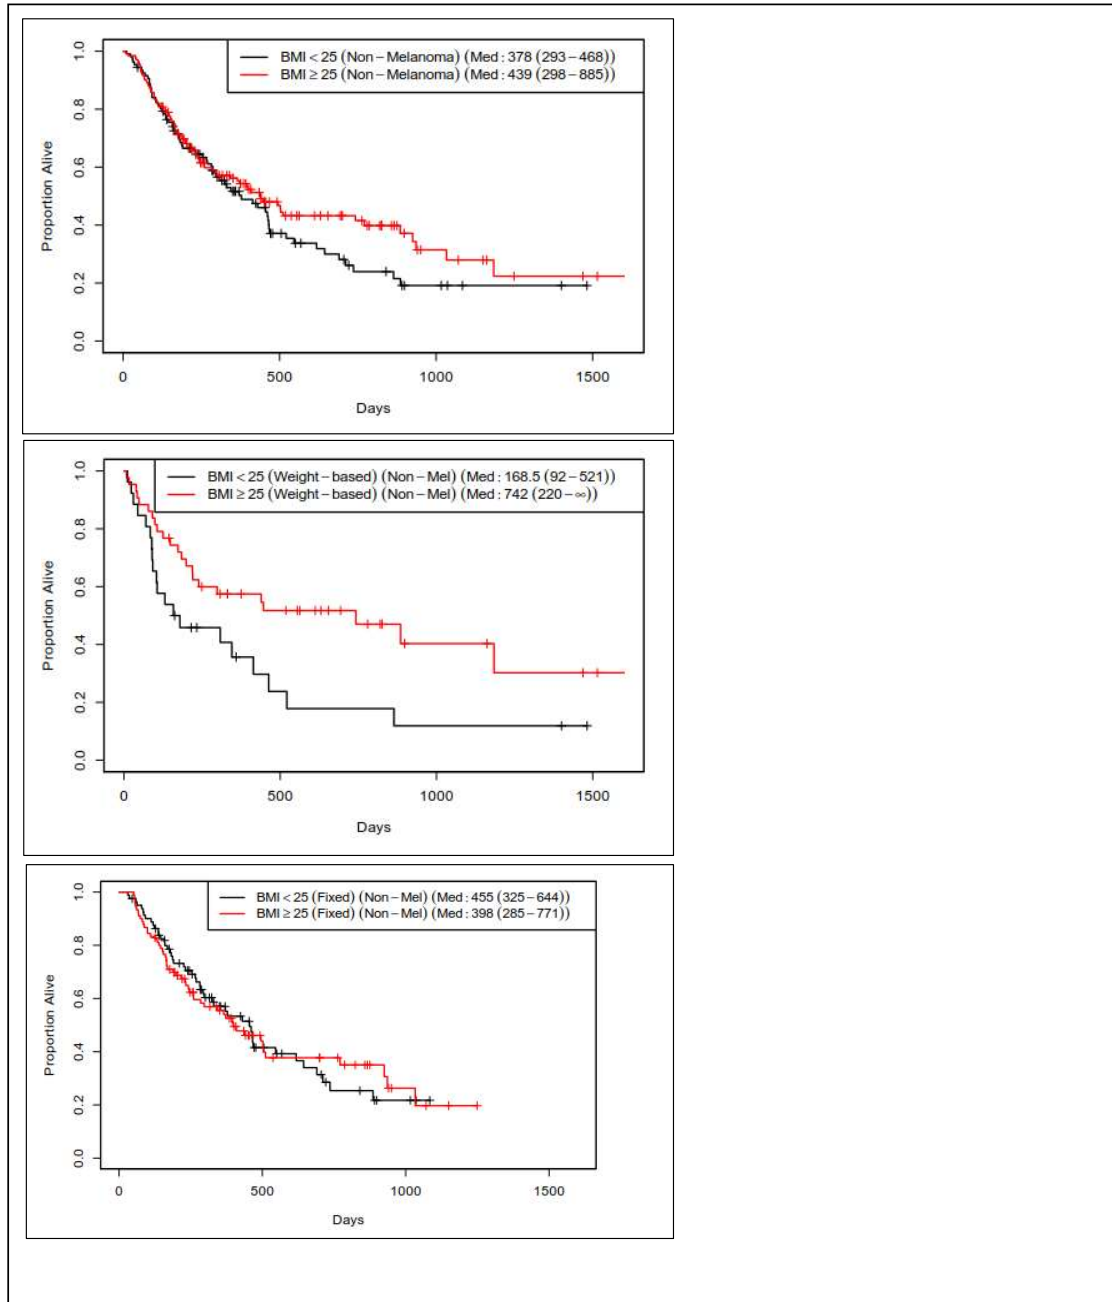

Supplemental Figure 3. (a—top; b—bottom)

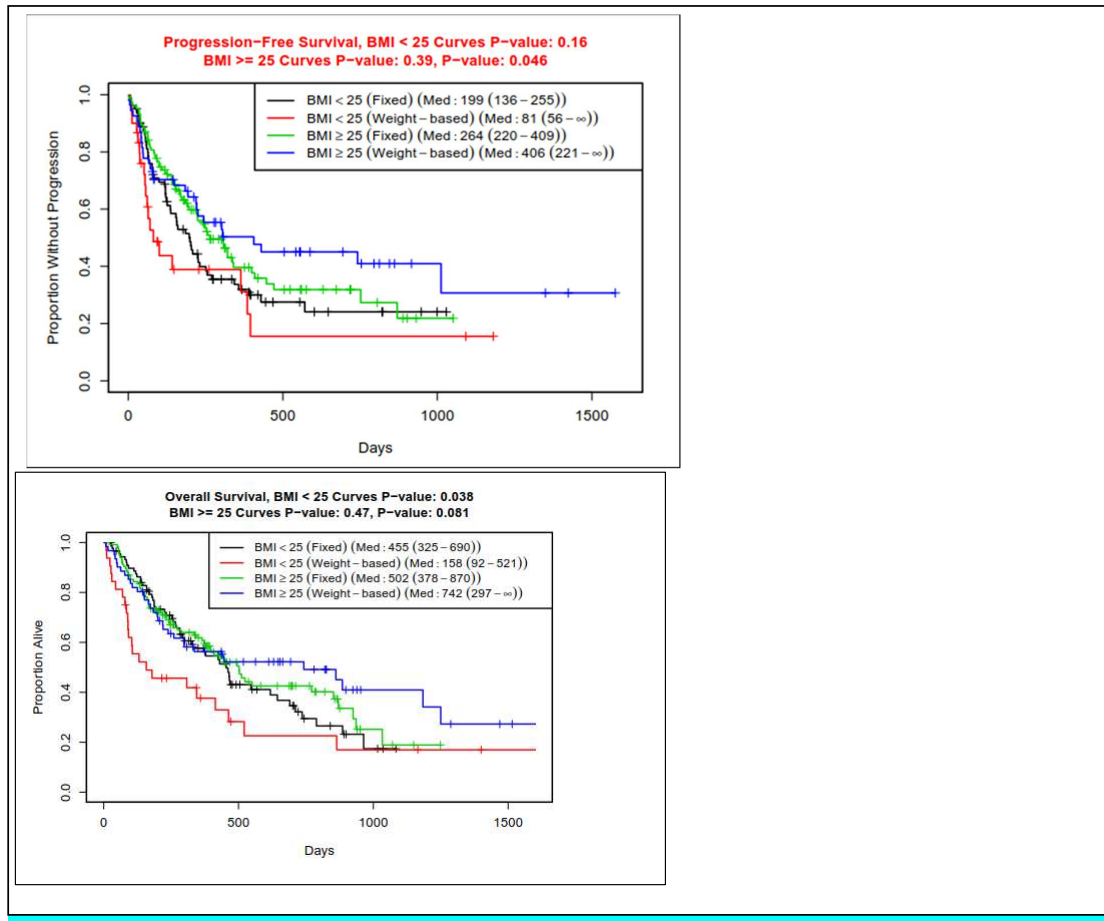

Supplemental Figure 4. (a—top left; b—top right; c—bottom left; d—bottom right)

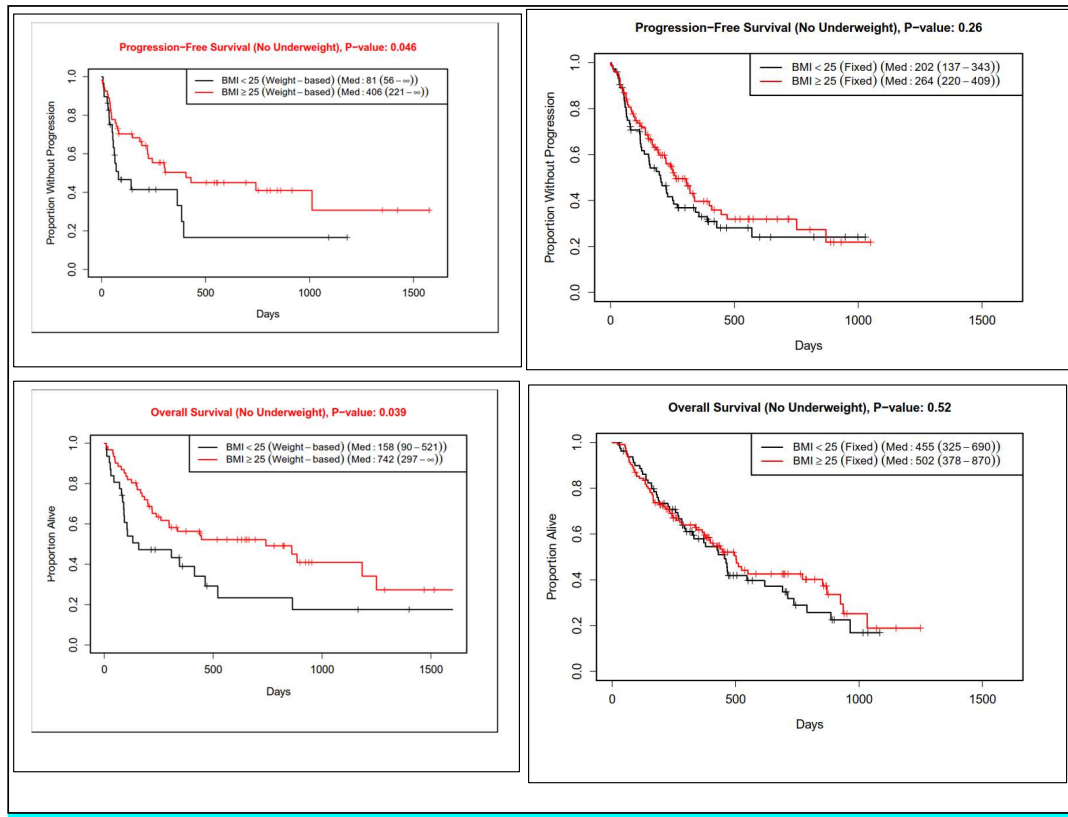

**Supplemental Figure 5. (a—top left; b—top right; c—bottom left; d—bottom right)**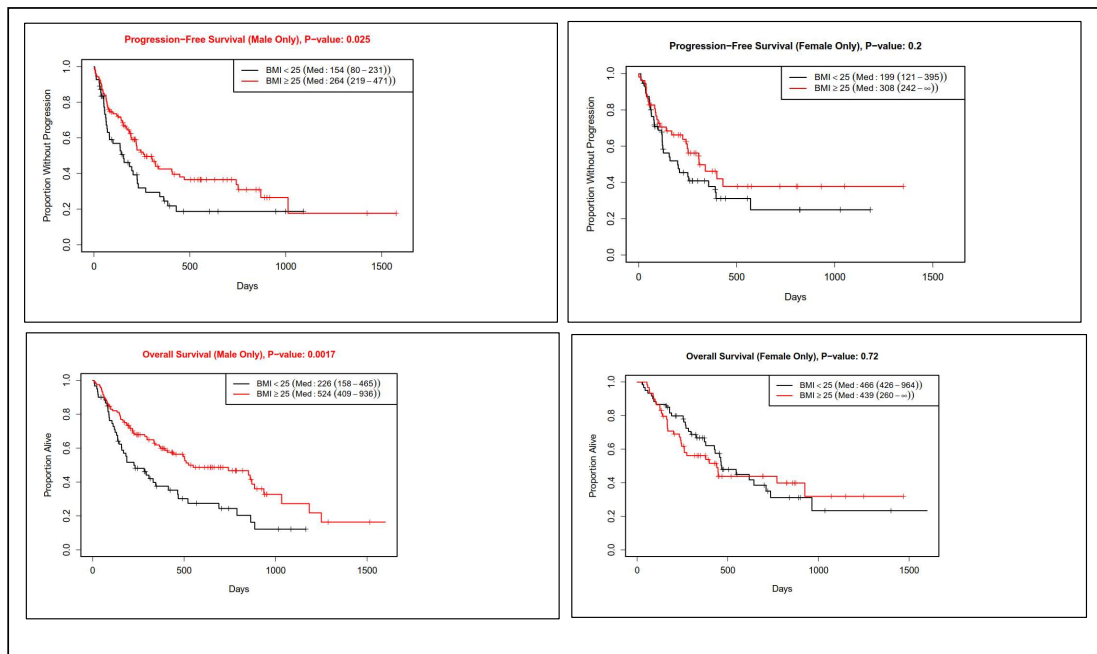

Supplemental Figure 6. (a—top left; b—top right; c—bottom left; d—bottom right)

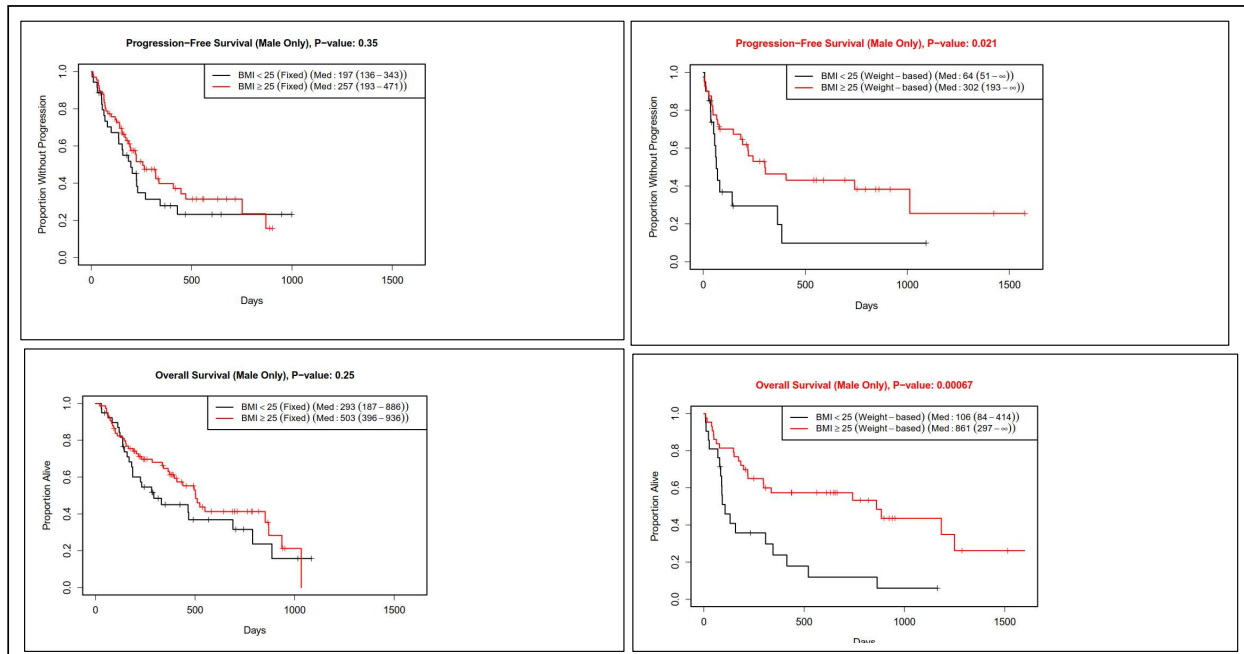



Supplemental Figure 7. (a—top left; b—top right; c—bottom left; d—bottom right)

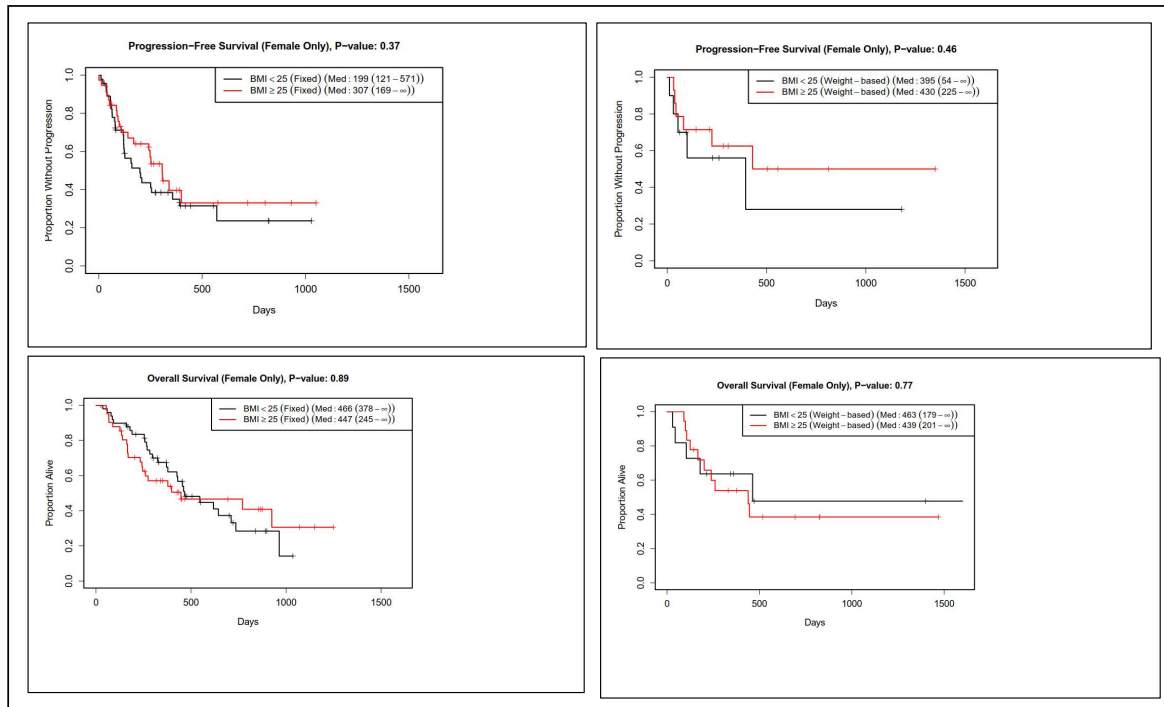

Supplemental Figure 8. (a—left; b—right)

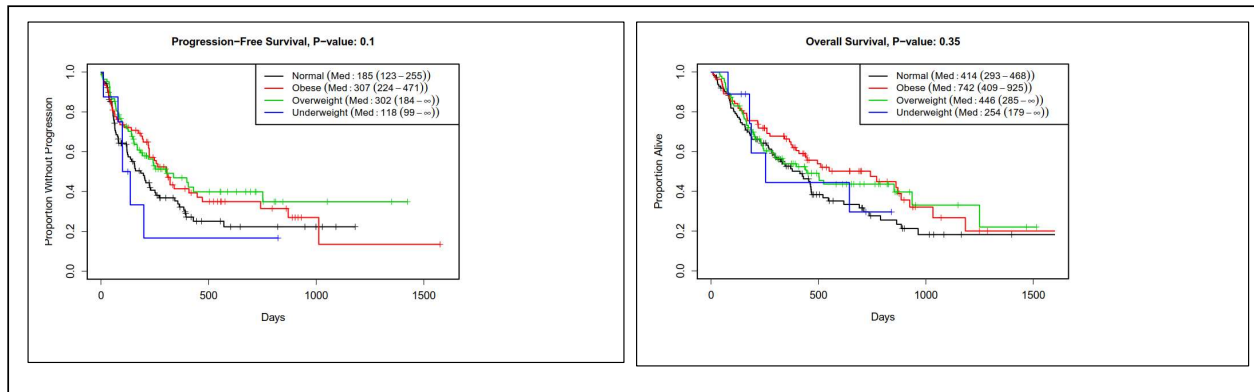

Supplement: jitc-2021-002349supp001.pdf [file jitc-2021-002349supp001.pdf]
